# Supplementary material
Source: publisher figshare collection journal article supplement (https://gsapubs.figshare.com/ndownloader/files/22411809)
Supplement: Supplementary file 1 [file 22411809]

Archive with 8 entries (8 files):
- Figure_S1a_raster_PNG.pdf
- Figure_S1b_fault_map_PNG.pdf
- Figure_S2_BP_aftershocks.pdf
- Figure_S3_Goosebury_graben_VS_PNG.pdf
- Figure_S4_Sheep_Creek_VS_PNG.pdf
- Figure_S5_Arentson_Gulch_VS_PNG.pdf
- GES02096_SuppCode.pdf
- Supplemental figure captions.docx
