# Supplementary material
Source: publisher figshare collection journal article supplement (https://gsapubs.figshare.com/ndownloader/files/22411809)
Supplement: Supplementary file 1 [file 22411809 › GES02096_SuppCode.pdf]

Code S1. Matlab code *Scarp\_VS.m*

```
% Scarp_VS.m
%
% The subroutine "slopeangle_f.m" needs to be in the same folder as this code
%
% For instructions on use see Supplementary text S3 - Instructions for
% Profile Verical Separation Code
%
% Input from make_xy.m (optional)
clc; clear all; close all

%Define empty matrices for compiling values
Pname_comb = [];
scarp_off_comb = [];
prof_leng_comb = [];
upper_slope_comb = [];
lower_slope_comb = [];
max_slope_comb = [];
inf_point_comb = [];
pref_anstr_comb = [];
count = [];

%Load profile data
[fn pn] = uigetfile('*.dat;*.txt','Select profile data');
ld_str = ['load ' fn];
eval(ld_str);
ntemp = fn(1:(length(fn) - 4));
assn_str = ['data = ' ntemp ';''];
eval(assn_str);

%loop to allow additional vertical separation measurements
loop = 1; while loop == 1;
close all
clearvars -except ntemp data Pname_comb scarp_off_comb prof_leng_comb ...
    lower_slope_comb upper_slope_comb max_slope_comb inf_point_comb count
preferred_scarp_offset pref_anstr_comb

%select inclination data, and subtract 90 (convert to degrees above
horizontal)
xp = (data(:,1));
yp = (data(:,2));

%check to make sure profile faces left
l = length(xp);
if xp(1) > xp(l);
    xp = abs(xp-max(xp)); %flip x
end
clear l;

h = xp; h_orig = xp;
e = yp; e_orig = yp;

% call slopeangle_f function to get horiz. dist and slope angles, giving h
and e
[dhor, sa] = slopeangle_f (h,e);
```

```

get(0,'ScreenSize'); %get screen dimensions
set(0,'Units','pixels');
screen = get(0,'ScreenSize');

%vertical scaling correction (if there are window plot issues)
VS = 0.85;

%figure 1: scarp profile
%*****

%Figure position: [left bottom width height]
figure('Position', [screen(3)/4 1 screen(3)*(2/3) screen(4)*VS]);

s1 = subplot (2,1,1);
s_ax = get(s1,'Position');

hold on
plot(dhor,sa,'k:');
plot(dhor,sa,'b. ');
ylabel ('slope (deg)')
axis tight;
grid on;
figure (1)
t1 = subplot (2,1,2);
t_ax = get(t1,'Position');
hold on
plot(xp,yp,'k:');
plot(xp,yp,'r. ');
axis image
grid on;
xlabel ('Horizontal distance (m)')
ylabel ('Vertical distance (m)')

clear fn pn ld_str assn_str

%Query user whether to select subset of data
prompt={'Select subset of profile (1 = yes, 0 = no)?'};
title='Select?';
lineNo = 1;
Def_ans = {'0'};
answer=inputdlg(prompt,title,lineNo,Def_ans);
selct_anstr = (answer{1});
selct_anstr = str2num(selct_anstr);

if selct_anstr == 1;

m1 = ('Click twice to define profile subset');
msg1 = msgbox(m1,'Message'); uiwait(msg1);

figure(1)
% Click to select subset of profile
[xtl ytl] = ginput(1);
[xtu ytu] = ginput(1);

```

```

if xtl > xtu %check values
    a = xtl;
    b = xtu;
    xtl = b; xtu = a; %switch values so xtl < xtu
end

for i = 1:length(h);
    if h(i) >= xtl & h(i) <= xtu
        xp2(i) = xp(i);
        yp2(i) = yp(i);
    end
end

close all;

nz = (xp2 > 0); % eliminate values equal to zero
h = xp2(nz);
e = yp2(nz);

xp = h;
yp = e;

h_orig = xp; %reset orig profile to subset
e_orig = yp;

% call slopeangle_f function to get horiz. dist and slope angles, giving h
and e
[dhor, sa] = slopeangle_f (h,e);

figure('Position', [screen(3)/4 1 screen(3)*(2/3) screen(4)*VS]);

subplot 211
hold on
plot(dhor,sa,'k:')
plot(dhor,sa,'b.')
xlabel ('Horizontal distance (m)')
ylabel ('slope (deg)')
sv = [ min(h) max(h) min(sa)-5 max(sa)+5];
axis(sv);
grid on;
figure (1)

subplot 212
hold on
plot(xp,yp,'k:');
plot(xp,yp,'r.');
axis image
grid on;
xlabel ('Horizontal distance (m)')
ylabel ('Vertical distance (m)')

end

%Query user whether to remove parts of profile (e.g., veg)
prompt={'Exclude part of profile (1 = yes, 0 = no)?'};
title='Remove?';

```

```

lineNo = 1;
def = {'0'};
answer=inputdlg(prompt,title,lineNo,def);
remov_ansr = (answer{1});
remov_ansr = str2num(remov_ansr);

if remov_ansr == 1;

prompt={'How many separate parts to exclude'};
title='Number?';
lineNo = 1;
answer=inputdlg(prompt,title,lineNo);
remov_ansr2 = (answer{1});
remov_ansr2 = str2num(remov_ansr2);

for j = 1:remov_ansr2

figure(1)

m1 = ('Click twice to select points to exclude');
msg1 = msgbox(m1,'Message'); uiwait(msg1);

% Click to select part of profile
[xtl ytl] = ginput(1);
[xtu ytu] = ginput(1);

if xtl > xtu %check values
    a = xtl;
    b = xtu;
    xtl = b; xtu = a; %switch values so xtl < xtu
end

for i = 1:length(h);
    if h(i) >= xtl & h(i) <= xtu
        xp(i) = 0;
        yp(i) = 0;
    end
end

close all;

nz = (xp > 0); % eliminate values equal to zero
h = xp(nz);
e = yp(nz);

xp = h;
yp = e;

figure('Position', [screen(3)/4 1 screen(3)*(2/3) screen(4)*VS]);

subplot 211
hold on
plot(dhor,sa,'k:')
plot(dhor,sa,'b.')
xlabel ('Horizontal distance (m)')
ylabel ('slope (deg)')

```

```

sv = [ min(h) max(h) min(sa)-5 max(sa)+5];
axis(sv);
grid on;
figure (1)

subplot 212
hold on
plot(h_orig,e_orig,'c.')
plot(xp,yp,'k:');
plot(xp,yp,'r.');
axis image
grid on;
xlabel ('Horizontal distance (m)')
ylabel ('Vertical distance (m)')

end
end

m1 = ('Click twice to select points to use for lower far-field slope');
msg1 = msgbox(m1,'Message'); uiwait(msg1);

figure(1)

[xtl1 ytl1] = ginput(1);
[xtl2 ytl2] = ginput(1);

m1 = ('Click twice to select points to use for upper far-field slope');
msg1 = msgbox(m1,'Message'); uiwait(msg1);

figure(1)
[xtu1 ytu1] = ginput(1);
[xtu2 ytu2] = ginput(1);

if xtl1 > xtl2 %check lower slope values
    a = xtl1;
    b = xtl2;
    xtl1 = b; xtl2 = a; %switch values so xtl1 < xtl2
end

if xtu1 > xtu2 %check upper slope values
    a = xtu1;
    b = xtu2;
    xtu1 = b; xtu2 = a; %switch values so xtl1 < xtl2
end

for i = 1:length(h)
    if h(i) >= xtl1 & h(i) <= xtl2
        lh(i) = h(i); %lower horiz
        le(i) = e(i); %lower elev
    end
end

for j = 1:length(h)
    if h(j) >= xtu1 & h(j) <= xtu2
        uh(j) = h(j); %upper horiz
    end
end

```

```

        ue(j) = e(j); %loer elev
    end
end

nz = (lh > 0); % eliminate values equal to zero
lh = lh(nz);
le = le(nz);

nz = (uh > 0); % eliminate values equal to zero
uh = uh(nz);
ue = ue(nz);

%transform profile data so in columns ascending.
fflh = flipud(rot90(lh)); %lower horiz
ffle = flipud(rot90(le)); %lower elev
ffuh = flipud(rot90(uh)); %upper horiz
ffue = flipud(rot90(ue)); %upper elev

% Linear regression to fit line through upper and lower slope points.
pl = polyfit(fflh,ffle,1);
pu = polyfit(ffuh,ffue,1);

%Evaluate goodness of fit of regression to data
lower_x = fflh; lower_y = ffle;
lower_p = polyfit(lower_x,lower_y,1);
lower_yfit = polyval(lower_p,lower_x);
lower_yresid = lower_y-lower_yfit;
lower_SSresid = sum(lower_yresid.^2);
lower_SStotal = (length(lower_y)-1)*var(lower_y);
lower_rsqu = 1-lower_SSresid/lower_SStotal;
lower_RMSE = sqrt(mean((lower_y-lower_yfit).^2));

upper_x = ffuh; upper_y = ffue;
upper_p = polyfit(upper_x,upper_y,1);
upper_yfit = polyval(upper_p,upper_x);
upper_yresid = upper_y-upper_yfit;
upper_SSresid = sum(upper_yresid.^2);
upper_SStotal = (length(upper_y)-1)*var(upper_y);
upper_rsqu = 1-upper_SSresid/upper_SStotal;
upper_RMSE = sqrt(mean((upper_y-upper_yfit).^2));

%Determine slope angles
lower_slope = atan(pl(1))*180/pi;
upper_slope = atan(pu(1))*180/pi;

% Extend linear projection beyond scarp face.
ext_dist = (min(ffuh)-max(fflh))/2;

l1 = length(fflh);
h1ext = fflh(l1) + ext_dist; %changed from +40/-40 to + 60/-60
huext = ffuh(1) - ext_dist;

h1 = cat(1,fflh,h1ext);
hu = cat(1,huext,ffuh);

e1 = polyval(pl,h1);

```

```

eu = polyval(pu,hu);

hold on

plot(hl,el,'bo:');
plot(hu,eu,'bo:');

%plot R^2 and RMSE values
Lrsq = num2str(lower_rsq,'%3.2f');
text(lower_x(length(lower_x)),lower_y(1),Lrsq,'Color','b');
text(lower_x(round(length(lower_x)/2)),lower_y(1),'R^2','Color','b');

Ursq = num2str(upper_rsq,'%3.2f');
text(upper_x(length(upper_x)),upper_y(1),Ursq,'Color','b');
text(upper_x(round(length(upper_x)/2)),upper_y(1),'R^2','Color','b');

Lrmse = num2str(lower_RMSE,'%3.2f');
text(lower_x(round(length(lower_x)/2)),lower_y(length(lower_y)),Lrmse,'Color',
'm');
text(lower_x(1),lower_y(length(lower_y)),'RMSE','Color','m');

Urmse = num2str(upper_RMSE,'%3.2f');
text(upper_x(round(length(upper_x)/2)),upper_y(length(upper_y)),Urmse,'Color',
'm');
text(upper_x(1),upper_y(length(upper_y)),'RMSE','Color','m');

%Determine number of profile points used
Lower_prof_pts = length(lower_x);
Upper_prof_pts = length(upper_x);

zoom on

% Determine max slope of the scarp face.
figure(1)

m1 = ('Click twice to select points to use for scarp slope');
msg1 = msgbox(m1,'Message'); uiwait(msg1);

[mx1,my1] = ginput(1);
[mxu,myu] = ginput(1);

if mx1 > mxu %check values
    a = mx1;
    b = mxu;
    mx1 = b; mxu = a; %switch values so mx1 < mxu
end

for k = 1:length(h)
    if h(k) >= mx1 & h(k) <= mxu
        slpx(k) = h(k);
        slpy(k) = e(k);
    end
end

tf2 = (slpx > 0); % eliminate zeros from data.

```

```

mx = slpx(tf2);
my = slpy(tf2);

ps = polyfit(mx,my,1); % calculate max slope.

max_slope = atan(ps(1))*180/pi;

% Calculate scarp vertical separation and inflection point.
% Find the intersection between the far field slope lines and
% max slope line.

figure(1)

int_el = (ps(2)*pl(1)-pl(2)*ps(1))/(pl(1)-ps(1));
int_hl = (int_el-ps(2))/ps(1);

int_eu = (ps(2)*pu(1)-pu(2)*ps(1))/(pu(1)-ps(1));
int_hu = (int_eu-ps(2))/ps(1);

int_e = [int_el int_eu];
int_h = [int_hl int_hu];
plot(int_h,int_e,'go--')
scarp_ht = int_eu-int_el;

inflection_point = (int_hl+int_hu)/2;

au = polyval(pu,inflection_point);
al = polyval(pl,inflection_point);

scarp_offset = au - al; % calculate scarp vertical separation

ax = [inflection_point inflection_point];
ay = [al au];

plot(ax,ay,'r-','LineWidth',1.5)

%Shift data to inflection point

hs = h-inflection_point;
es = e-polyval(ps,inflection_point);

%plot vertical separation on figure
plot_x = min(h); plot_y = max(e);

%text(plot_x, plot_y,'File name:', 'FontSize',10);
plot_str = ['Profile: ' ntemp];
text(plot_x, plot_y,plot_str);

plot_y2 = plot_y-((max(e)-min(e))/4);
%text(inflection_point+.01, ax, '(m):', 'FontSize',10);
str1 = num2str(scarp_offset, '%3.2f');
text(inflection_point+((au-al)/2), min(ay),str1, 'Color', 'r', 'FontSize',11);

profile_length = max([xtu2; xtu1])-min([xtl1; xtl2]);

```

```

%Query user whether to include results in compilation
%*****
prompt={'Include results? (1 = yes, 0 = no)'};
title='Compile?';
lineNo = 1;
def = {'1'};
answer=inputdlg(prompt,title,lineNo,def);
compile_anstr = (answer{1});
compile_anstr = str2num(compile_anstr);

if compile_anstr == 1;

%prompt user to name profile version
prompt={'Profile version (numeric; ie., 2):'};
title='Name';
lineNo = 1;
%def = {'1'};
def = {num2str(sum(count)+1)};
answer=inputdlg(prompt,title,lineNo,def);
Pname = (answer{1});

%Query user whether measurement is preferred value
prompt={'Is this your preferred vertical separation? (1 = yes, 0 = no)'};
title='Preferred?';
lineNo = 1;
def = {'0'};
answer=inputdlg(prompt,title,lineNo,def);
preferred_anstr = (answer{1});
preferred_anstr = str2num(preferred_anstr);

if preferred_anstr == 1;

    preferred_scarp_offset = scarp_offset;

    str_p = [ntemp '_preferred_var.mat'];
    save_str_p = ['save ' str_p];
    eval(save_str_p);

    h_pref =(gcf);
    str_fig = ['savefig(h_pref, '' ntemp '_preferred.fig'')'];
    eval(str_fig);

end

%fprintf('\n')
fprintf('\n')
fprintf('Profile: %s',ntemp');

fprintf(', version: %s',Pname');
fprintf('\n')
fprintf('Scarp Offset (meters): %3.2f',scarp_offset');
fprintf('\n')
fprintf('Profile length (meters): %3.2f',profile_length');
fprintf('\n')
fprintf('Lower far-field slope (degrees): %3.2f',lower_slope');

```

```

fprintf('\n')
fprintf('Upper far-field slope (degrees): %3.2f',upper_slope');
fprintf('\n')
fprintf('Scarp slope (degrees): %3.2f',max_slope');
fprintf('\n')
fprintf('Preferred vertical separation? (1=yes, 0=no):
%3.0f',preferred_anstr);
fprintf('\n')
fprintf('\n')
fprintf('Regression Statistics:');
fprintf('\n')
fprintf('Number of lower-surface points: %3.0f',Lower_prof_pts);
fprintf('\n')
fprintf('R^2 for lower-surface regression: %3.2f',lower_rsqr);
fprintf('\n')
fprintf('RMSE for lower-surface regression: %3.2f',lower_RMSE);
fprintf('\n')
fprintf('Number of upper-surface points: %3.0f',Upper_prof_pts);
fprintf('\n')
fprintf('R^2 for upper-surface regression: %3.2f',upper_rsqr);
fprintf('\n')
fprintf('RMSE for upper-surface regression: %3.2f',upper_RMSE);
fprintf('\n')

%Plot Pname on figure
ver_str = num2str(Pname);
ver_str = ['Version: ' ver_str];
text(min(h), max(e)-((max(e)-min(e))/10),ver_str);

%Compile values
Pname_comb = [Pname_comb Pname];
scarp_off_comb = [scarp_off_comb scarp_offset];
prof_leng_comb = [prof_leng_comb profile_length];
lower_slope_comb = [lower_slope_comb lower_slope];
upper_slope_comb = [upper_slope_comb upper_slope];
max_slope_comb = [max_slope_comb max_slope];
pref_anstr_comb = [pref_anstr_comb preferred_anstr];
count = [count 1];

end

%Query user to loop back
prompt={'Re-run vertical separation measurement (1 = yes, 0 = no)?'};
title='Re-run?';
lineNo = 1;
Def_ans = {'1'};
answer=inputdlg(prompt,title,lineNo,Def_ans);
loop = (answer{1});
loop = str2num(loop);

end

%Query user whether to save
%*****
prompt={'Save results? (1 = yes, 0 = no)'};
title='Save?';
lineNo = 1;

```

```

def = {'1'};
answer=inputdlg(prompt,title,lineNo,def);
save_anr = (answer{1});

save_anr = str2num(save_anr);

if save_anr == 1;

    %prompt user to name profile
    prompt={'Text to be appended to file name (ie. ver2):'};
    title='Save';
    lineNo = 1;
    def = {'1'};
    answer=inputdlg(prompt,title,lineNo,def);
    Sname = (answer{1});

    %prompt user to select preferred, mean, or midpoint
    prompt={'Use preferred (1), mean (2), or midpoint (3)?'};
    title='Summary displacement?';
    lineNo = 1;
    def = {'1'};
    answer=inputdlg(prompt,title,lineNo,def);
    sum_anr = (answer{1});

    sum_anr = str2num(sum_anr);

    if sum_anr == 1;
        scarp_off_sum = preferred_scarp_offset;

    elseif sum_anr == 2;
        scarp_off_sum = mean(scarp_off_comb);

    elseif sum_anr == 3;
        scarp_off_min = min(scarp_off_comb);
        scarp_off_max = max(scarp_off_comb);
        scarp_off_sum = (scarp_off_max+scarp_off_min)/2;
    end

    %Pname_mn = mean(Pname_comb);
    scarp_off_min = min(scarp_off_comb);
    scarp_off_max = max(scarp_off_comb);

    prof_leng_mn = mean(prof_leng_comb);
    upper_slope_mn = mean(upper_slope_comb);
    lower_slope_mn = mean(lower_slope_comb);
    max_slope_mn = mean(max_slope_comb);
    inf_point_mn = mean(inf_point_comb);
    profile_runs = sum(count);

    %save summary and mean values
    a = [scarp_off_sum; scarp_off_min; scarp_off_max; prof_leng_mn;
        lower_slope_mn; ...
        upper_slope_mn; max_slope_mn; profile_runs];

    str2 = [ntemp '_' Sname '-summary'];
    save_str = ['save ' str2 '.txt '-ascii ' 'a'];

```

```

eval(save_str);

%save all individual vertical separation values
c = scarp_off_comb;
d = prof_leng_comb;
e = lower_slope_comb;
f = upper_slope_comb;
g = max_slope_comb;
h = pref_anstr_comb;

P_indiv = [c; d; e; f; g; h];

str3 = [ntemp '_' Sname '-individual'];
save_str = ['save ' str3 '.txt ' '-ascii ' 'P_indiv'];
eval(save_str);

end

fprintf('\n')
fprintf('Data file name: %s',ntemp');
fprintf('\n')
if save_anstr == 1;
fprintf('Saved data name: %s',Sname');
fprintf('\n')
end

if sum_anstr == 1; %preferred
fprintf('Summary scarp vertical separation (meters): %3.2f',scarp_off_sum');
fprintf('\n')

elseif sum_anstr == 2; %mean
fprintf('Mean scarp vertical separation (meters): %3.2f',scarp_off_sum');
fprintf('\n')

elseif sum_anstr == 3; %midpoint
fprintf('Midpoint scarp vertical separation (meters): %3.2f',scarp_off_sum');
fprintf('\n')
end

fprintf('Minimum scarp vertical separation (meters): %3.2f',scarp_off_min');
fprintf('\n')
fprintf('Maximum scarp vertical separation (meters): %3.2f',scarp_off_max');
fprintf('\n')
fprintf('Mean profile length (meters): %3.2f',prof_leng_mn');
fprintf('\n')
fprintf('Mean lower far-field slope (degrees): %3.2f',lower_slope_mn');
fprintf('\n')
fprintf('Mean upper far-field slope (degrees): %3.2f',upper_slope_mn');
fprintf('\n')
fprintf('Mean scarp slope (degrees): %3.2f',max_slope_mn');
fprintf('\n')
fprintf('Number of iterations: %3.0f',sum(count)');
fprintf('\n')

```

```
% slopeangle_f.m
% for use with 2 dimensional profile data (distance, elevation)
% dhor = horiz. distance for slope points, sa = slope angles
% call as:
%
% [dhor,sa] = slopeangle_f(h,e)

function [dhor, sa] = slopeangle_f(h,e)

de = diff(e);
dd = diff(h);
sa = atan(de./dd)*180/pi;

for i = 1:length(h)-1
dhor(i) = ((h(i+1)-h(i))/2)+h(i);
end
```
