# Supplementary material
Source: publisher figshare collection journal article supplement (https://gsapubs.figshare.com/ndownloader/files/22411809)
Supplement: Supplementary file 1 [file 22411809 › Supplemental figure captions.docx]

Figure S1. Digital surface models (DSMs) for the southernmost Warm Springs and northern Thousand Springs sections showing (a) elevation above mean sea level and (b) the extent of the 1983 Mw 6.9 Borah Peak and prehistoric surface ruptures and vertical separation (VS) measurements reported in meters. Ticks show kilometer marks along the LRFZ and Arentson Gulch fault. Base maps are 0.5-m-pixel DSMs (down-sampled from 0.1-m-pixel DSMs included in Bunds, 2019) shaded by slope (≥40º slopes in black). Map shows DSMs (yellow polygons) in the context of the 1983 Borah Peak surface rupture (red). Fault traces and time of most recent faulting modified from USGS (2018). Base map is National Elevation Dataset (NED) 10-m digital elevation model (DEM). Inset map shows regional context. LFZ – Lemhi fault zone, BFZ – Beaverhead fault zone, ESRP – Eastern Snake River Plain, INL – Idaho National Laboratory. Base map is NED 10-m DEM.

Figure S2. Aftershocks of the 1983 Borah Peak earthquake from <https://earthquake.usgs.gov/earthquakes/search/>.

Figure S3. Upper panel: DSM for the 1983 rupture of the southernmost Warms Springs section (Figure 4a). Lower panel: surficial geologic map showing three fluvial terraces. Scarp profiles (green lines) show that terrace T2 records 3.7–3.8 m of VS compared to inset terrace T1 which records ~2.1 m. Terrace T0 is not faulted. Base maps are slopeshade maps (≥40º slopes in black).

Figure S4. Surficial geologic map of the southernmost Warm Springs section (Figure 4a) showing four fluvial terraces. Scarp profiles (blue and green lines) show that terraces T2a and T2b records 2.7–3.5 m of VS compared to inset terrace T1 which records ~2.0 m. Terrace T0 is not faulted. Base maps are slopeshade maps (≥40º slopes in black).

Figure S5. DSM for the northernmost Arentson Gulch fault (Figure 4b) (upper panel), showing topographic profiles (blue and green lines) and VS measurements for prehistoric scarps (orange) and the 1983 rupture (red) (lower panel). Base maps are slopeshade maps (≥40º slopes in black).
