# Supplementary material
Source: publisher figshare collection journal article supplement (https://gsapubs.figshare.com/ndownloader/files/22411809)

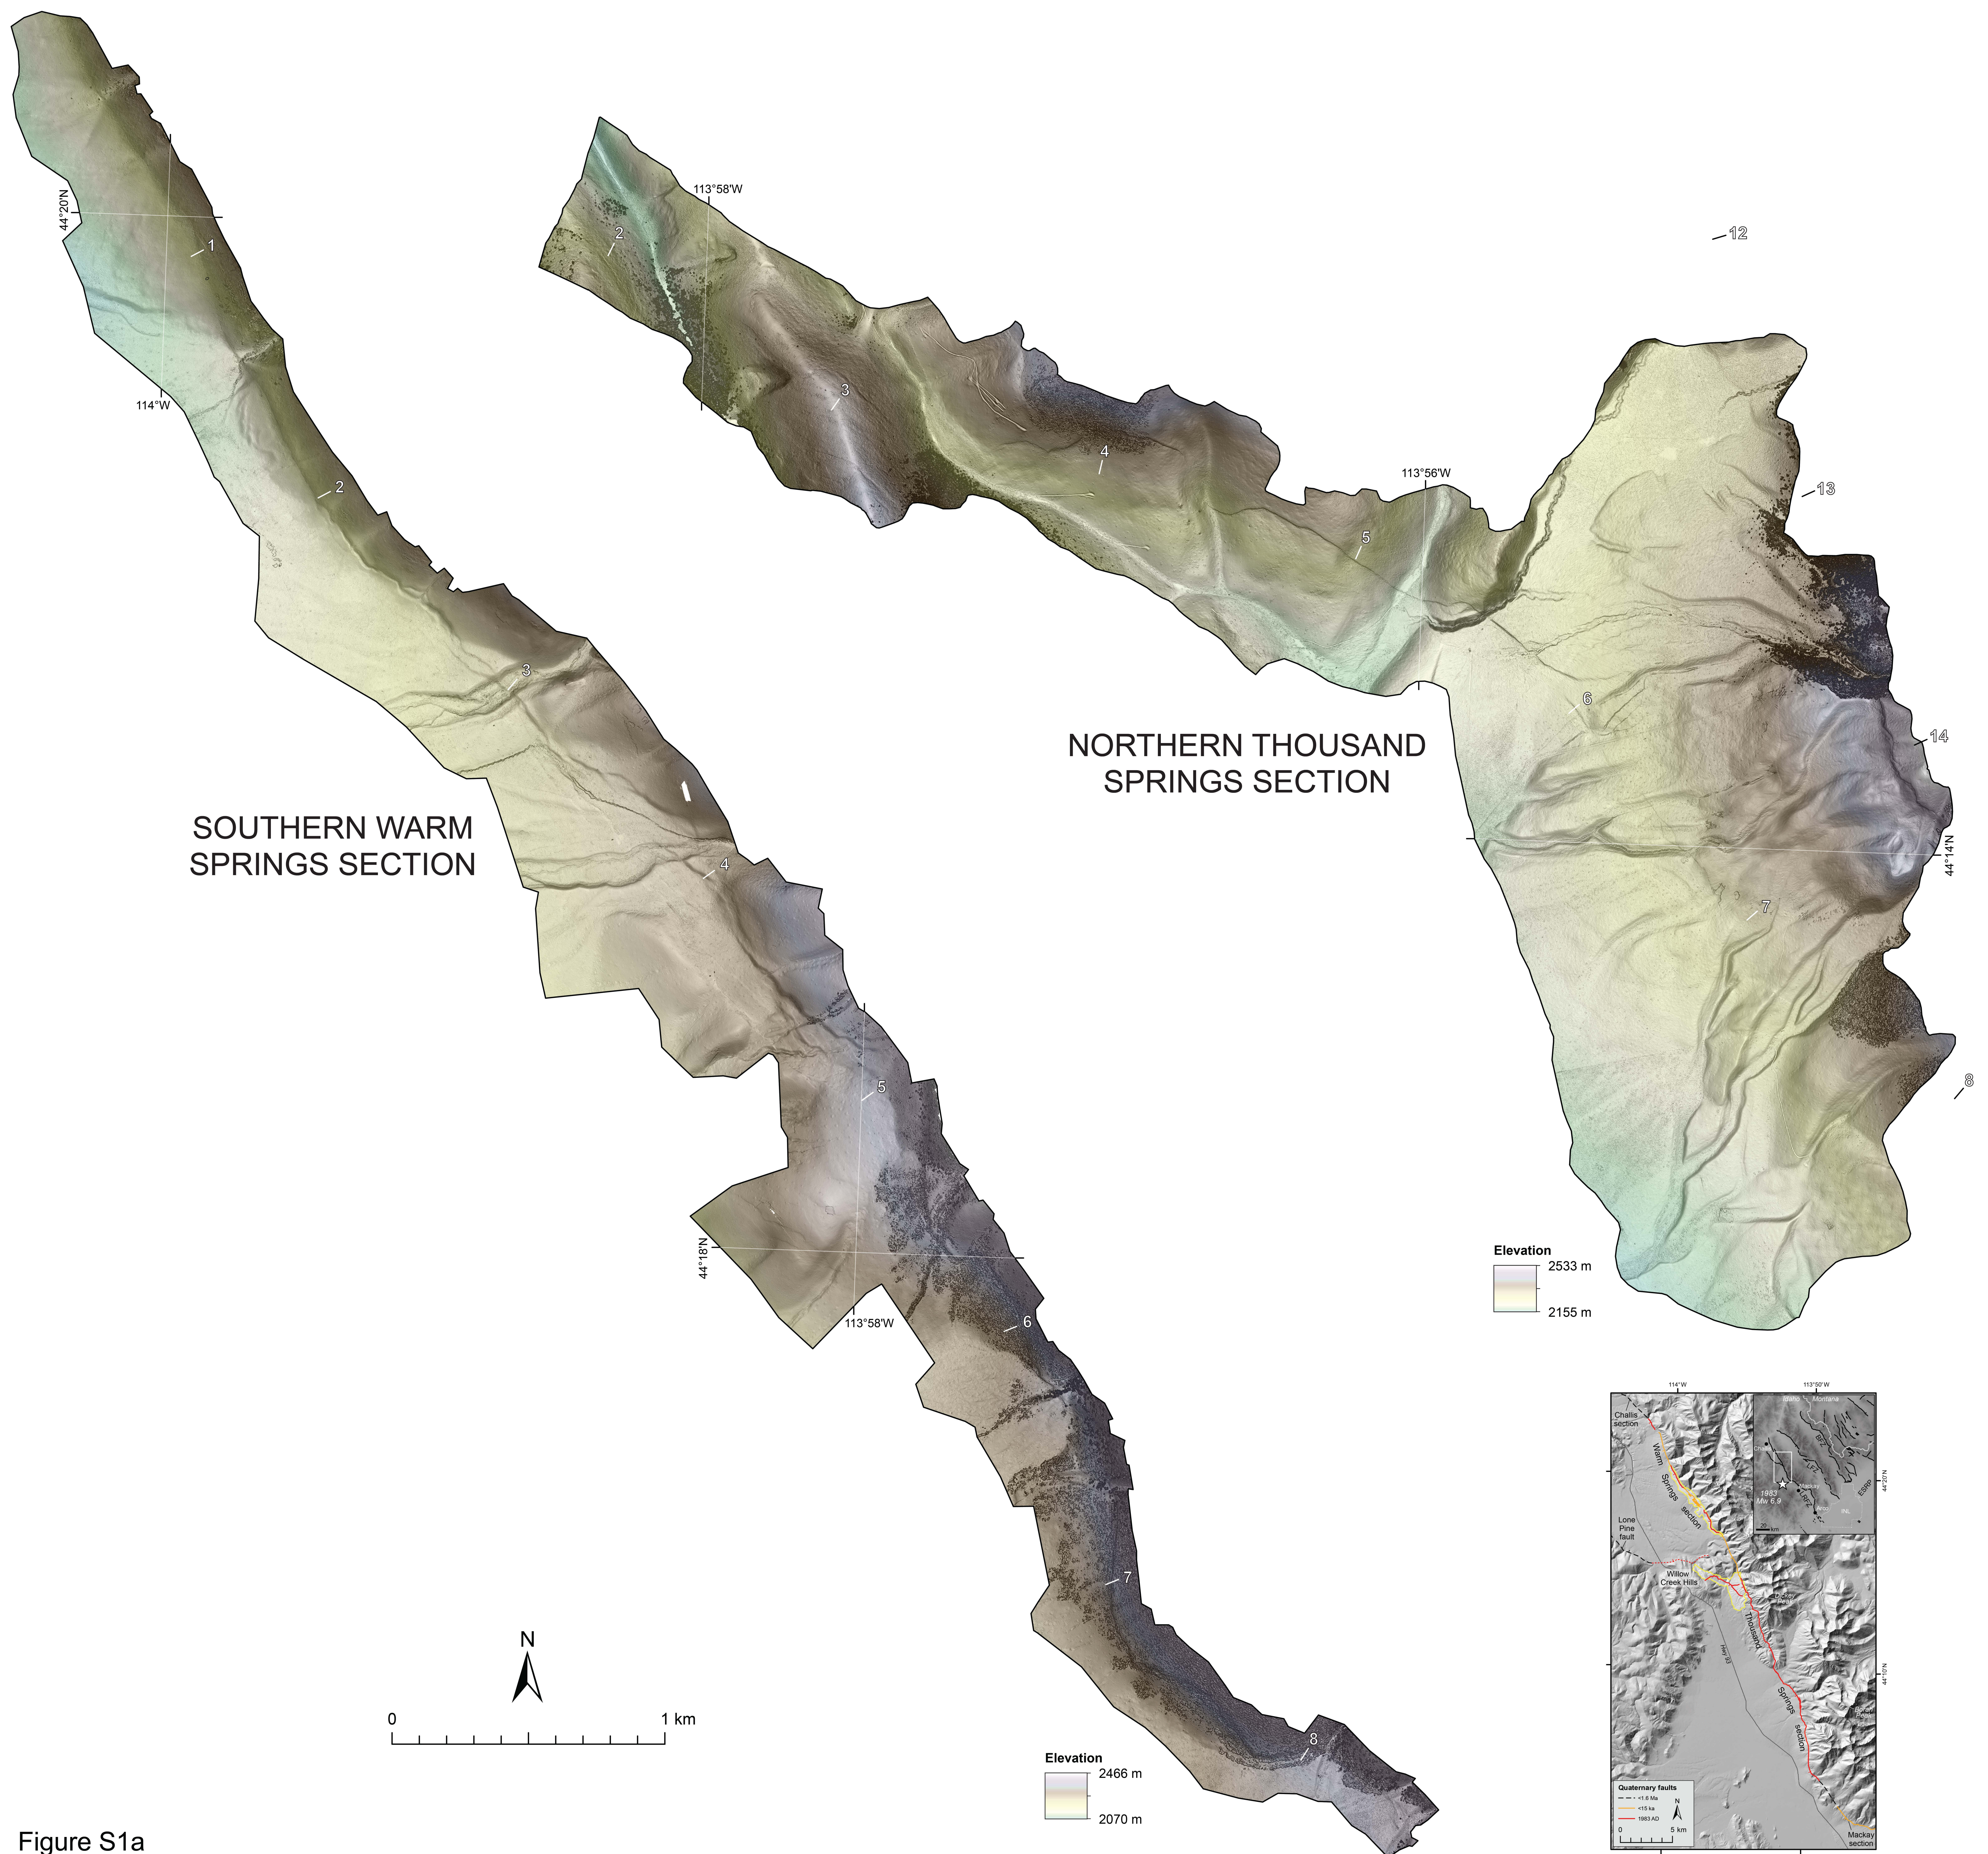

Figure S1a

Supplement: Supplementary file 1 [file 22411809 › Figure_S1a_raster_PNG.pdf]

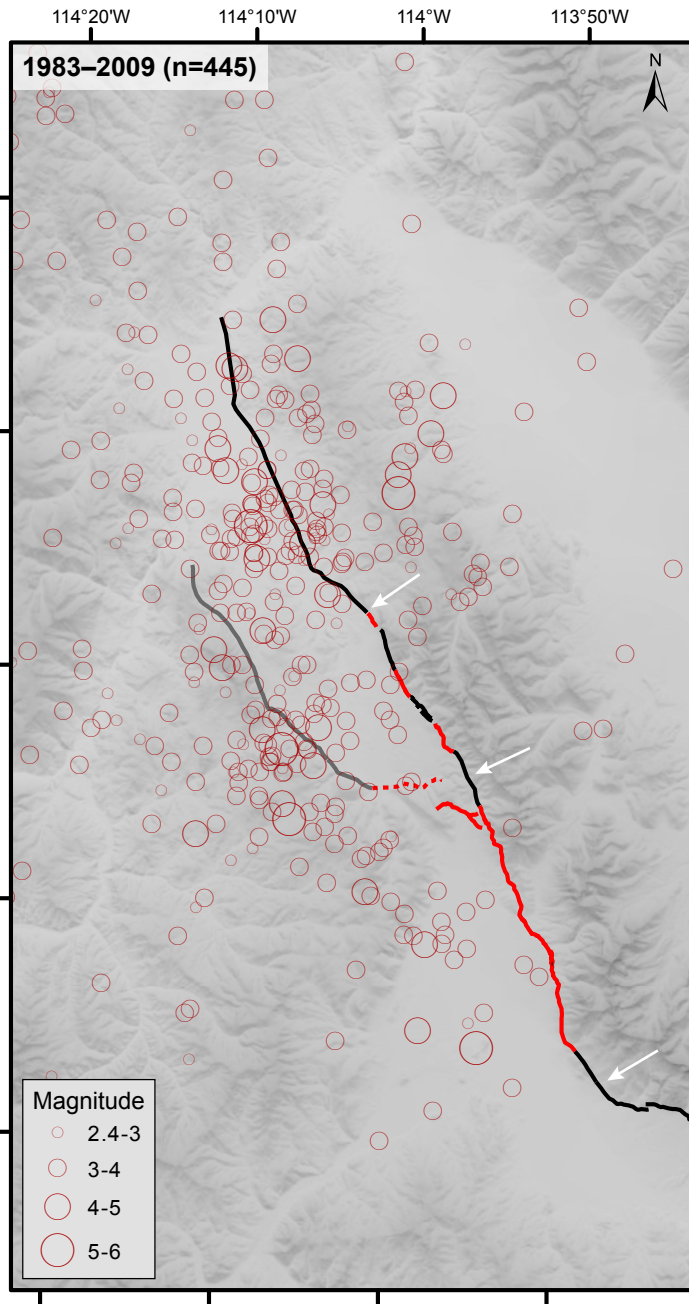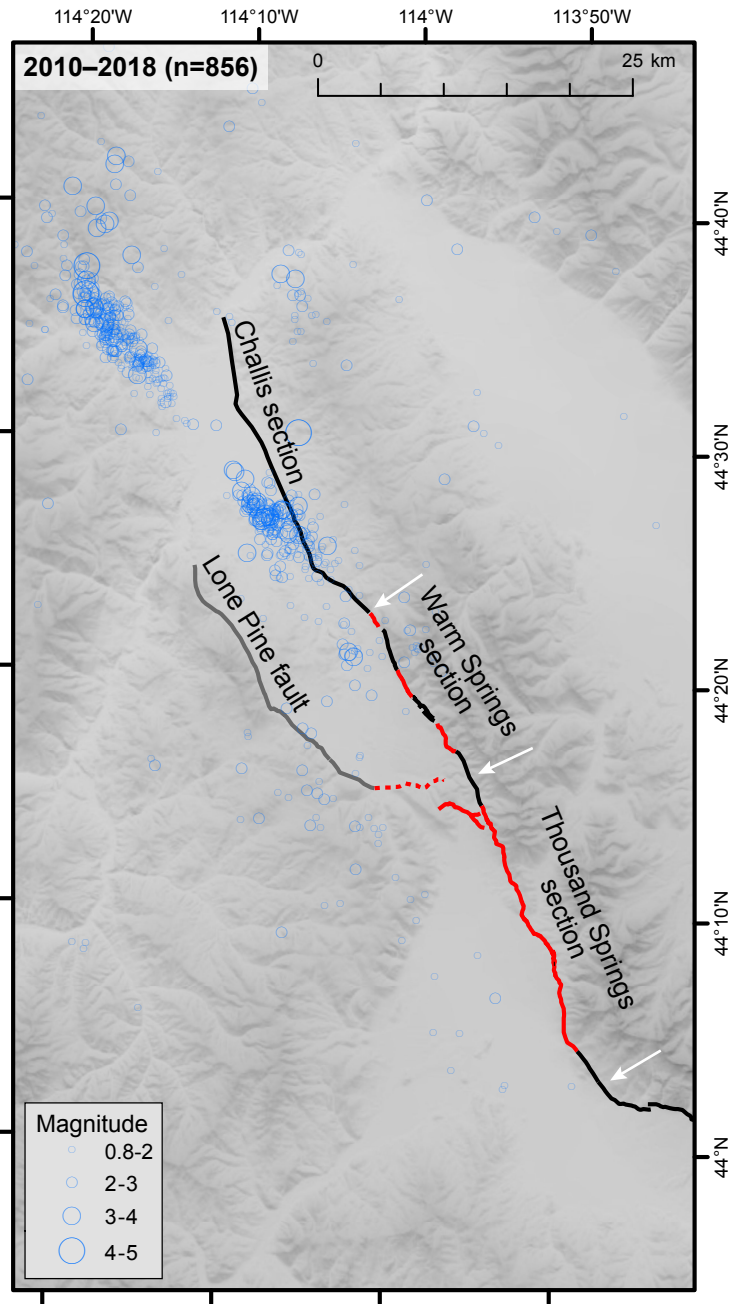

Figure S2

Supplement: Supplementary file 1 [file 22411809 › Figure_S2_BP_aftershocks.pdf]

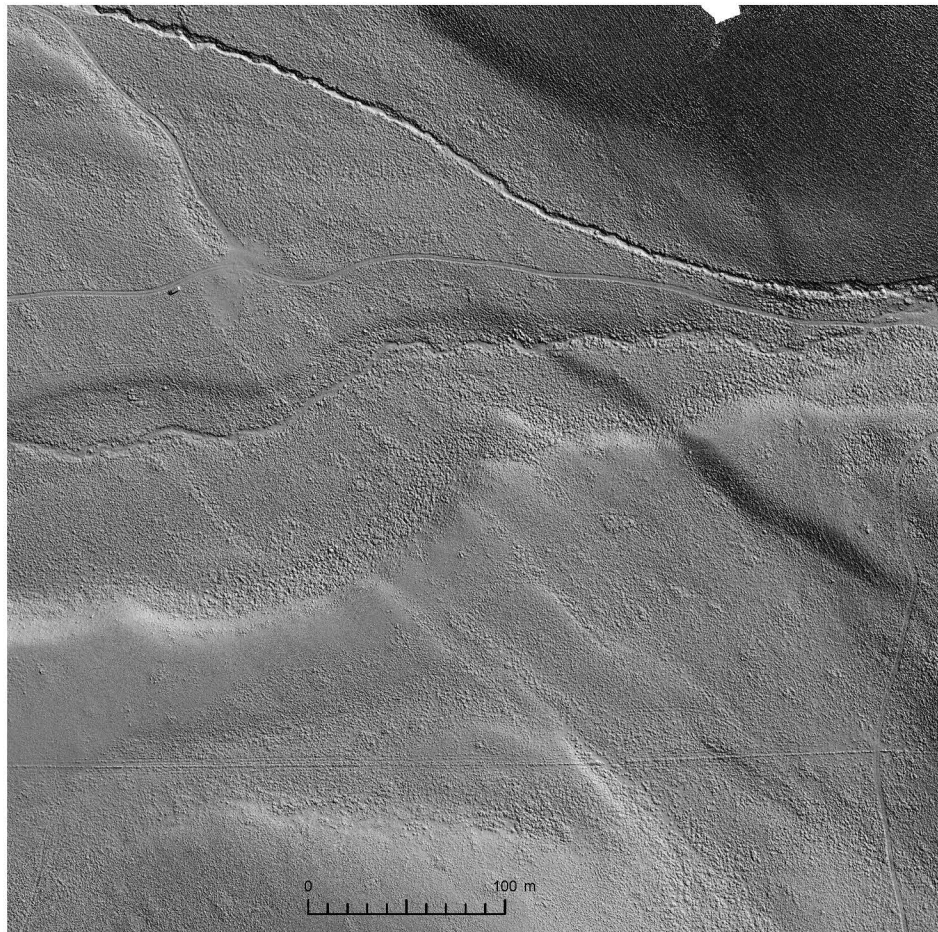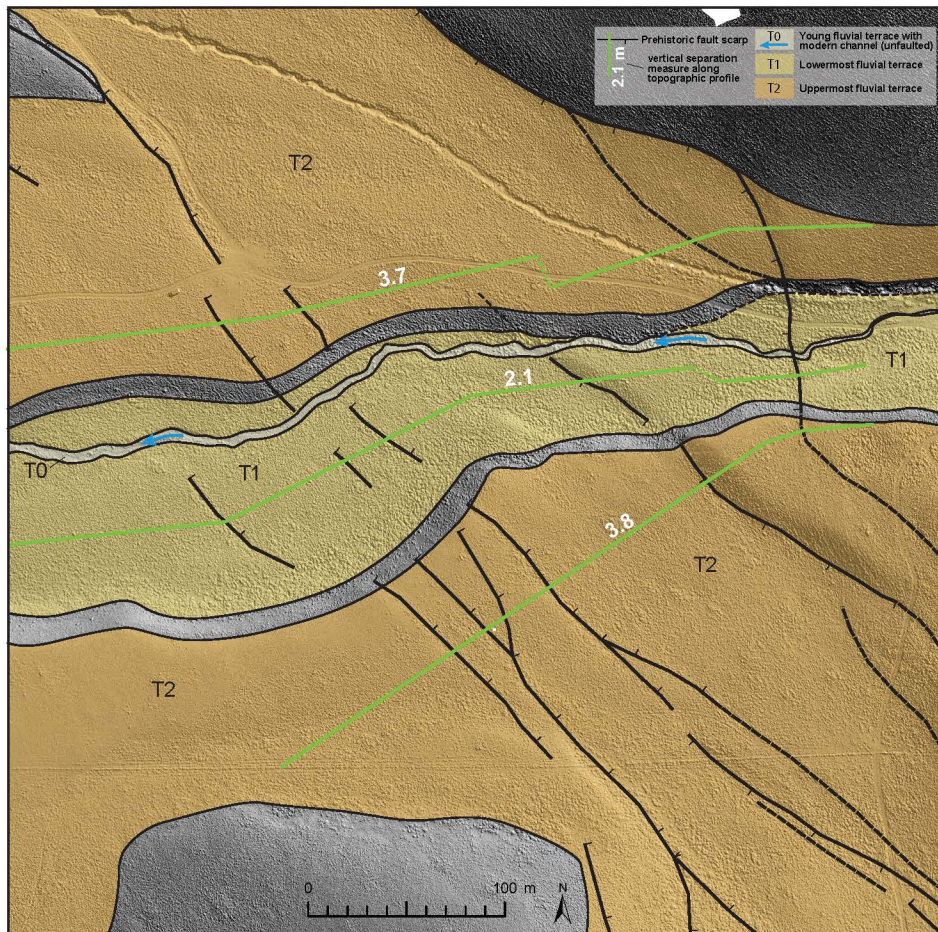

Figure S3

Supplement: Supplementary file 1 [file 22411809 › Figure_S3_Goosebury_graben_VS_PNG.pdf]

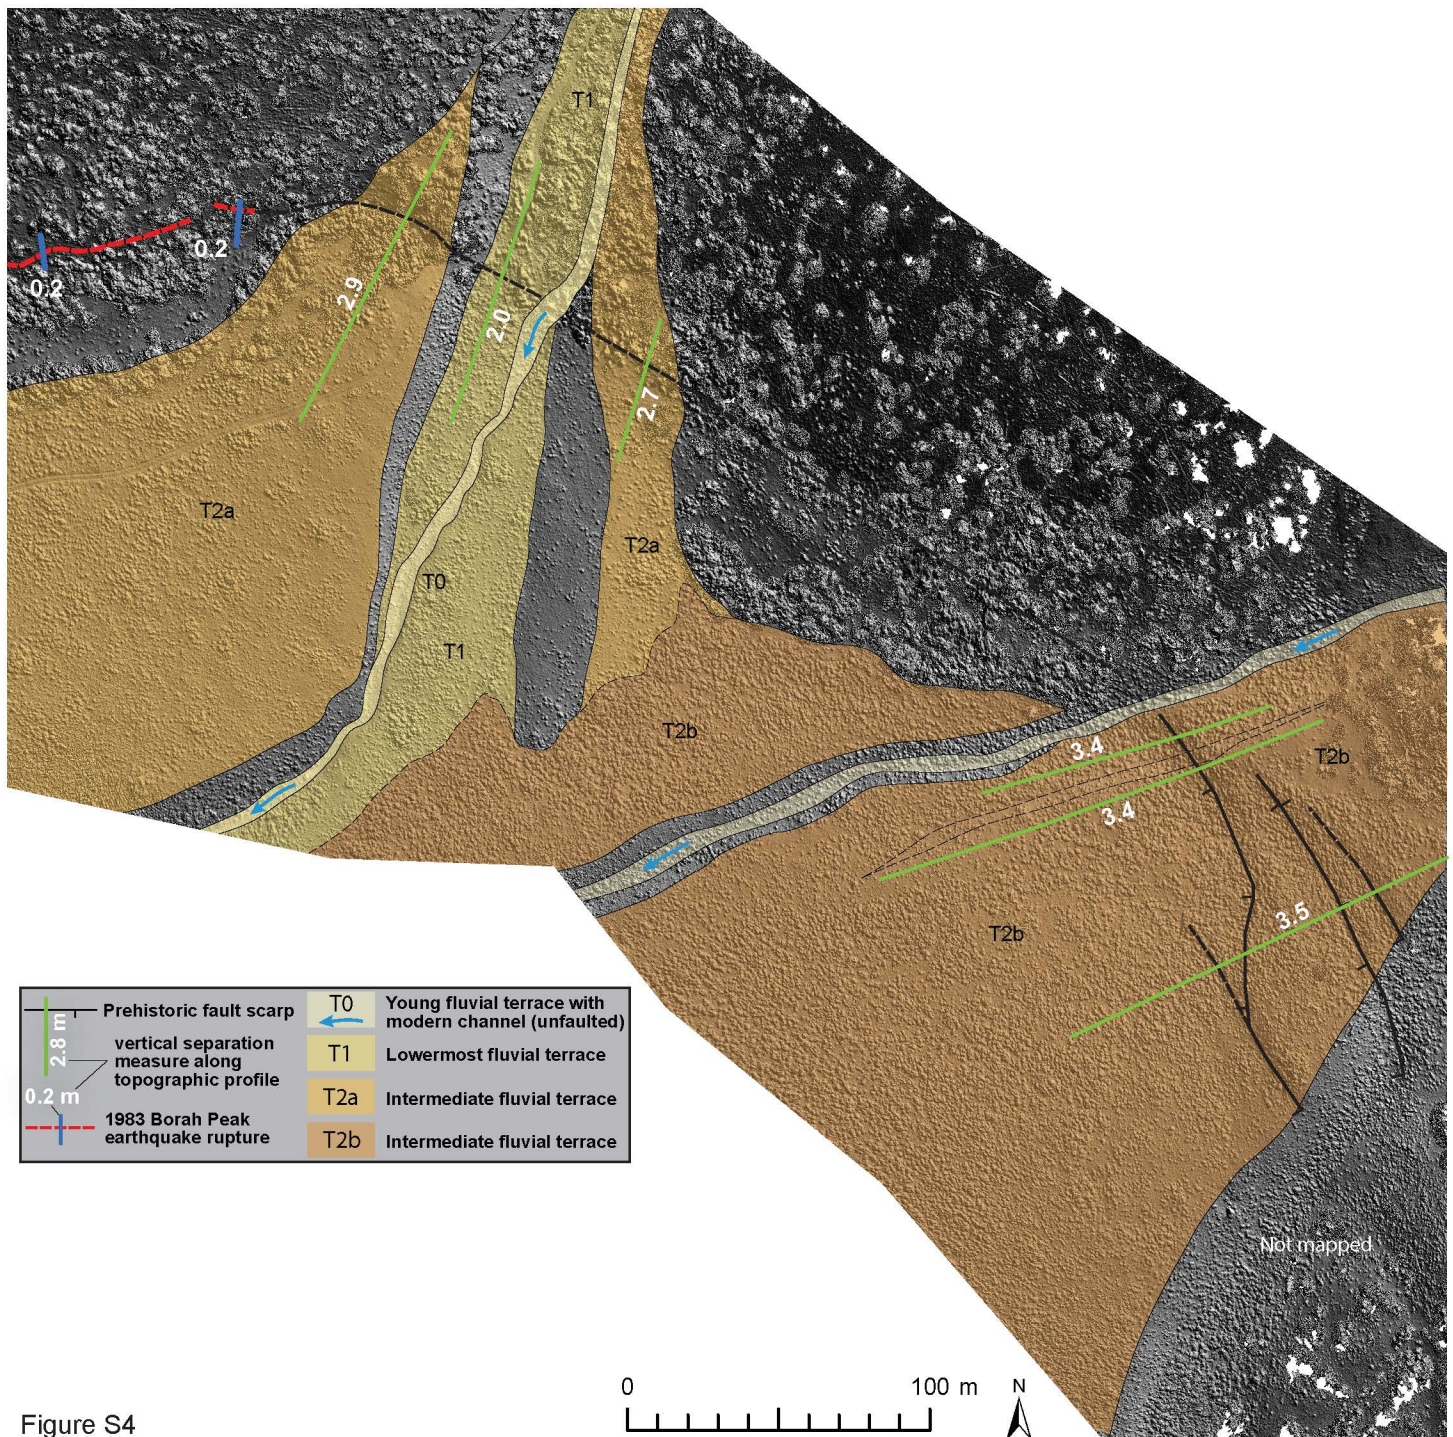

Figure S4

Supplement: Supplementary file 1 [file 22411809 › Figure_S4_Sheep_Creek_VS_PNG.pdf]

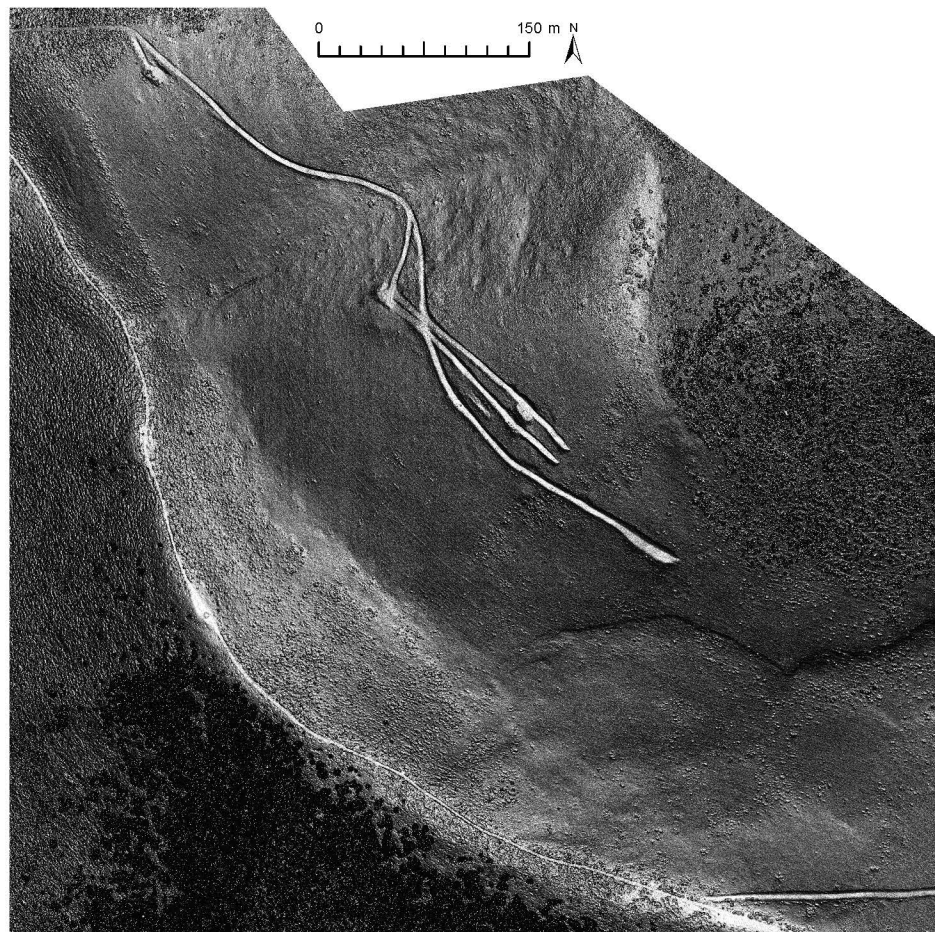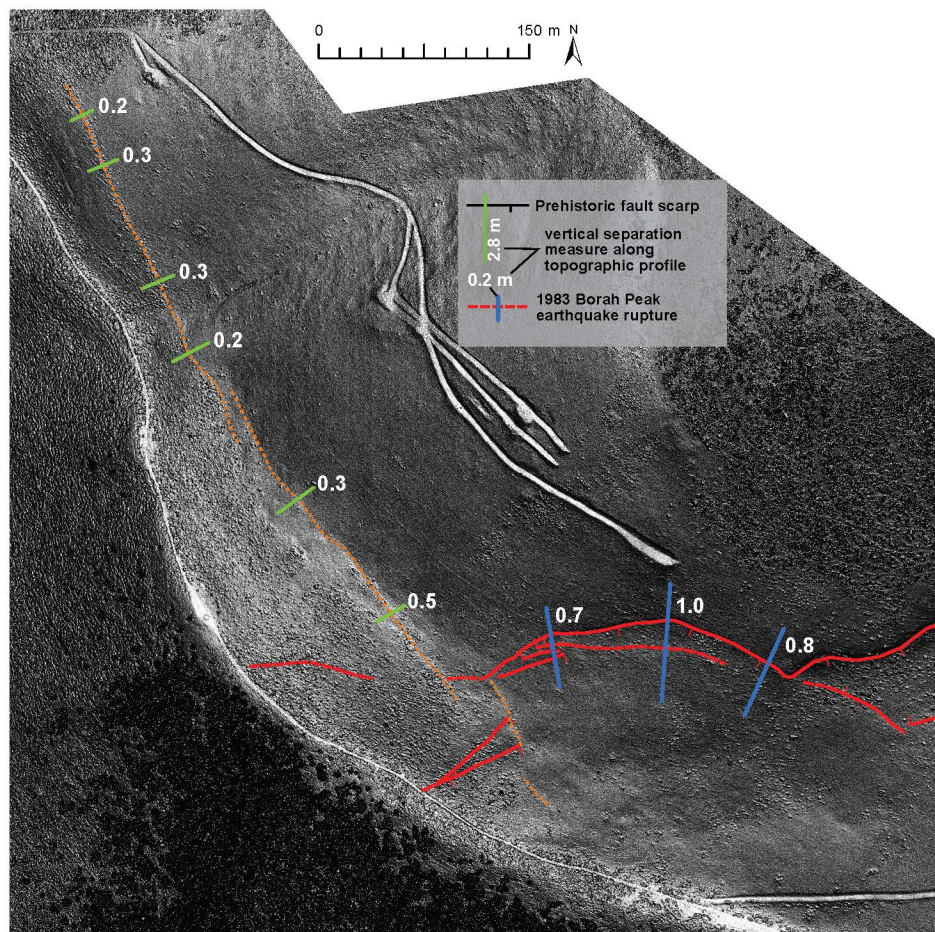

Figure S5

Supplement: Supplementary file 1 [file 22411809 › Figure_S5_Arentson_Gulch_VS_PNG.pdf]
